# Supplementary material for: Genomics of perivascular space burden unravels early mechanisms of cerebral small vessel disease
Source: Research Square preprint supplement (doi:10.21203/rs.3.rs-963149/v1), 2021-10-21
Supplement: Supplementary file 2 [file 76fa4ff9ebca49c314d22831.xlsx]

## Sheet: Suppl.Table-1
Supplemental Table 1. Study design and sample characteristics of the individual studies
Study	Sample with MRI & genotype data, N	Sample excluded for stroke, N	Sample excluded for other pathologies, N *	Sample used in analyses (GWAS), N	Sample used in follow-up in young adults, N	Sample used in analyses (WGS), N	Age at MRI (years)	Women	Systolic BP (mmHg)	Diastolic BP (mmHg)	Hypertension †	Antihypertensive drug intake	Type II diabetes mellitus ‡	Total cholesterol (mmol/L)	Hypercholesterolemia	Triglycerides (mmol/L)	Low-density liproptein (mmol/L)	High-density lipoprotein (mmol/L)	Lipid-lowering drug	current smoker	Body mass index (kg/m²)	History of cardiovascular disease at MRI §	Baseline intracranial volume (cm3)	Covariates used
							mean ± SD	N (%)	mean ± SD	mean ± SD	N (%)	N (%)	N (%)	mean ± SD	N (%)	mean ± SD	mean ± SD	mean ± SD	N (%)	N (%)	N (%)	N (%)	mean ± SD
3C-Dijon	1683	71	8	1500		340	72.72 ± 4.13	919 (61.3)	148.82 ± 22.92	84.93 ± 11.54	1147 (76.5)	645 (43.0)	119 (8.0)	5.77 ± 0.93	841 (56.1)	1.21 ± 0.54	3.57 ± 0.82	1.65 ± 0.40	488 (32.5)	88 (5.9)	25.39 ± 3.76	62 (4.1)	1363.76 ± 135.95	age, sex, total intracranial volume, PC1-4
ASPS	471			471		54	65.64 ± 8.34	272 (57.7)	144.23 ± 23.44	87.79±10.46	331 (70.3)	163 (34.6)	33 (7)	5.88±1.10	393 (83.4)	1.50 ± 0.85	3.72 ± 0.98	1.47 ± 0.45	49 (10.4)	56 (11.9)	26.69±4.09	32 (6.8)	0.7 8± 0.04 (BPF)	age, sex, brain parenchymal fraction
ASPS-Fam	306			306			64.47 ± 10.45	183 (59.8)	138.96 ± 22.06	86.79±9.18	211 (69.0)	132 (43.1)	22 (7.2)	5.42±1.02	232(75.8)	1.38 ± 0.86	3.09 ± 0.83	1.76 ± 0.51	56 (18.3)	48 (15.7)	26.63±4.68	84 (27.5)	1477.82 ± 144.79	age, sex, total intracranial volume, PC1-2
EDIS-SCES	138	11		127			70.82 ± 6.18	69 (54.3)	145.3 ± 17.96	76.48 ± 10.20	97 (76.4)	72 (56.7)	29 (22.8)	5.02 ± 0.88	73 (57.5)	1.28 ± 0.62	2.94 ± 0.72	1.47 ± 0.37	52 (40.9)	10 (7.9)	18.8 ± 2.60	4 (3.1)	1092 ± 98.54	age, sex, total intracranial volume
EDIS-SIMES	222	14		212			71.06 ± 6.99	124 (55.9)	151.97 ± 20.34	79.46 ± 11.49	193 (86.9)	122 (57.5)	72 (32.4)	5.20 ± 1.22	176 (79.3)	1.60 ± 0.88	3.15 ± 1.04	1.35 ± 0.38	105 (49.5)	22 (9.9)	20.57 ± 4.19	11 (5.2)	1057.52 ± 125.05	age, sex, total intracranial volume
FHS	199	1	7	191			55.9997 ± 14.1387	107 (56.02)	118.2957 ± 14.3991	73.1129 ± 10.1413	68 (36.56)	55 (29.57)	7 (3.78)	4.8275 ± 0.8640	41 (31.30)	1.1762 ± 0.6134	2.6823 ± 0.7785	1.6033 ± 0.4284	32 (25.20)	9 (4.84)	27.86 ± 5.98	12 (6.45)	1233.656 (116.8244)	age, sex, total intracranial volume
i-Share	1748				1748	544	22.1 ± 2.3	1254 (71.7)	NA	NA	NA	NA	NA	NA	NA	NA	NA	NA	NA	NA	21.9 ± 3.3	NA	1569.0 ± 137.4	age, sex, total intracranial volume, PC1-4
ISSYS	241			241			64.8 ± 6.1	80 (33.2)	144 ± 16	78 ± 9.6	241 (100)	225 (93.4)	62 (25.7)	5.586 ± 1.034	172 (71)	NA	NA	1.241 ± 0.310	108 (45)	29 (12)	30 ± 4.6	34 (14)	180.14 ± 12.24 cm2	age, sex, total intracranial area, PC1-2
LBC1936	624	41	1	582		573	72.49 ± 0.71	273 (46.9)	149.2 ± 18.91 **	78.31 ± 9.39 **	499 (86) ††	301 (52) ††	59 (10) §§	NA	NA	NA	NA	NA	NA	304 (52)	27.85 ± 4.42	156 (27) §§	1452.89 ± 143.15	age, sex, total intracranial volume, PC1-3
NOMAS - AA	168			168			73.52 ± 8.80	65 (38.69)	139.43 ± 17.16	79.27 ± 9.61	116 (69.05)	76 (45.24)	29 (17.26)	4.941 ± 1.016	72 (43.37)	1.157 ± 0.725	2.83 ± 0.916	1.586 ± 0.538	21 (12.5)	42 (25)	28.37 ± 5.55	26 (15.48)	1143.11 ± 118.15	age, sex, total intracranial volume, PC1-3
NOMAS - EUR	138			138			72.88 ± 9.19	71 (51.45)	132.96 ± 17.18	75.33 ± 9.95	73 (52.9)	45 (32.61)	45 (32.61)	5.017 ± 1.035	73 (52.9)	1.343 ± 0.93	2.89 ± 0.914	1.517 ± 0.506	24 (17.39)	19 (13.77)	27.20 ± 5.31	29 (21.01)	1222.60 ± 139.40	age, sex, total intracranial volume, PC1-3
NOMAS - HISP	717			717			68.95 ± 8.21	274 (38.21)	136.36 ± 17.39	78.46 ± 9.28	469 (65.41)	293 (40.92)	171 (23.85)	4.977 ± 1.015	339 (47.26)	1.532 ± 0.915	3.003 ± 0.915	1.284 ± 0.366	117 (16.32)	94 (13.11)	28.87 ± 4.85	108 (15.06)	1139.95 ± 112.76	age, sex, total intracranial volume, PC1-3
MAS						130	79.95 ±4.68	77 (59.2)	135.86 ± 24.17	78.09 ± 13.98	105 (80.76)	62 (47.69)	23 (17.69)	4.56 ± 0.98	72 (55.38)	1.13 ± 0.55	2.70 ± 0.89	1.35 ± 0.41	65 (50)	4 (3.07)	27.06 ± 3.58	10 (7.69)	1468.32 +152.68	age, sex, total intracranial volume
OATS						184	71.12 ± 5.04	113 (61.4)	134.56 ± 22.81	78.37 ± 13.33	129 (69.56)	86 (46.73)	20 (10.86)	5.29 ± 1.11	99 (53.80)	1.28 ± 0.69	3.25 ± 1.04	1.44 ± 0.41	66 (35.86)	5 (2.71)	27.26 ± 4.50	21 (11.41)	1481.82 +137.60	age, sex, total intracranial volume
RSI	986	53		933			79.1 ± 4.9	404 (43.3)	152.8 ± 21.4	83 ± 11.2	813 (87.1)	510 (54.7)	174 (19.6)	5.3 ± 1.1	467 (51.2)	1.4 ± 0.6	NA	1.5 ± 0.4	280 (30.0)	111 (11.9)	27.2 ± 4.0	129 (14.1)	1134.9 ± 117.5	age, sex, total intracranial volume, PC1-4
RSII	668	25		643			67.3 ± 5.4	323 (50.2)	143.3 ± 18.7	80.7 ± 10.3	454 (70.8)	226 (35.6)	79 (12.3)	5.7 ± 0.9	304 (47.8)	NA	NA	1.4 ± 0.4	138 (21.7)	101 (16.0)	27.6 ± 3.7	35 (5.4)	1142.7 ± 114.5	age, sex, total intracranial volume, PC1-4
RSIII	2492	67		2425			57.2 ± 6.5	1347 (55.5)	132.1 ± 18.5	82.2 ± 10.8	1133 (47.1)	601 (25)	212 (8.7)	5.6 ± 1.1	1095 (45.5)	1.5 ± 0.9	0.1 ± 0.6	1.4 ± 0.4	500 (20.8)	515 (21.5)	27.5 ± 4.3	83 (3.5)	1148.6 ± 115.2	age, sex, total intracranial volume, PC1-4
SHIP-2	1142	10	78	1036		186	55.5 ± 12.7	593 (52)	132 ± 18.3	80.5 ± 10.1	67.4 (46.9)	428 (37.5)	83 (8.2)	5.51 ± 1.07	NA	1.85 ± 1.32	3.36 ± 0.92	1.45 ± 0.387	158 (15.5)	117 (6.3)	27.6 ± 4.43	20 (2.0)	1427.07 ± 141.48	age, sex, total intracranial volume
SHIP-Trend Batch 1 + 2	2047	21	102	1960			50.9 ± 14	1071 (52.3)	126 ± 17.2	77.1 ± 9.86	61.5 (48.7)	655 (32)	117 (6.3)	5.5 ± 1.07	NA	1.55 ± 1.08	3.41 ± 0.916	1.46 ± 0.375	175 (9.4)	439 (23.6)	27.6 ± 4.48	22 (1.2)	1433.47 ± 141.50	age, sex, total intracranial volume
UKB	29208	553		28655			63.8 ± 7.5	15093 (52.7)	137.6 ± 18.2	78.9 ± 10.0	12530 (43.7)	6742 (23.7)	710 (2.5)	5.74 ± 1.08	13137 (48.0)	1.65 ± 0.97	3.59 ± 0.83	1.48 ± 0.38	6740 (23.7)	1036 (3.6)	26.53 ± 4.42	1121 (3.9)§§	1453.0 ± 216.6	age, sex, total intracranial volume, genotyping array, study centre, PC1-20
MRI = Magnetic Resonance Imaging; BPF = Brain Parenchymal Fraction; BP = Blood pressure; ; PC = Principal Component; ICV = Intracranial Volume; ASPS = Austrian Stroke Prevention Study; ASPS-Fam = Austrian Stroke Prevention Family Study; EDIS-SCES/EDIS-SIMES = The Singapore Chinese Eye Study/Singapore Malay Eye Study-2; FHS = Framingham Heart Study; i-Share = Internet-based Students' Health Resear…
* brain tumor or other conditions
† Hypertension is defined as systolic blood pressure ≥140 mm Hg, diastolic blood pressure ≥90 mm Hg or use of an antihypertensive drug;
‡ diabetes mellitus is defined as a fasting blood glucose ≥126mg/dl (7 mmol/L), or use of insulin or oral hypoglycemic agents for all the cohorts except FHS and SHIP and SHIP-TREND; in FHS diabetes mellitus is defined as a blood glucose ≥200 mg/dL or a fasting blood glucose ≥126 mg/dL or current treatment for diabetes; in SHIP and SHIP-TREND diabetes is defined as use of antidiabetics or HBA1C>6.5
§ history of cardiovascular disease at MRI includes cardiovascular disease as coronary heart disease, peripheral artery disease, or congestive heart failure in 3C-Dijon, EDIS-SIMES; it includes myocardial infarction or atrial fibrillation in ASPS; myocardial infarction, atrial fibrillation, angina pectoris or left ventricular hypertrophy in ASPS-Fam; in SHIP and SHIP-TREND it corresponds to self-…
** N=579, mean of 3 sitting
†† N=580
§§ self-report
a current or past
NA are non available

## Sheet: Suppl.Table-2
Supplemental Table 2. PVS burden cut-off description in each cohort
Cohorts	PVS in white matter				PVS in basal ganglia				PVS in hippocampus
	N total	Cut-off	Frequency of ext-PVS	N with ext-PVS	N total	Cut-off	Frequency of ext-PVS	N with ext-PVS	N total	Cut-off	Frequency of ext-PVS	N with ext-PVS
3C-Dijon	1500	≥ 3*	23.07	346	1500	≥ 3*	11.40	171	1500	≥ 3*	16.67	250
ASPS	471	≥ 20	23.35	110	471	≥ 9	21.23	100	471	≥ 6	20.17	95
ASPS-Fam	306	≥ 15	23.86	73	306	≥ 11	24.51	75	306	≥ 7	25.16	77
EDIS-SCES	127	≥ 7	25.20	32	127	≥ 5	10.24	13	127	≥ 3	23.62	30
EDIS-SIMES	212	≥ 7	27.36	58	212	≥ 5	24.06	51	212	≥ 3	18.40	39
FHS	191	≥ 3*	14.66	28	190	≥ 20	22.11	42	191	≥ 14	18.85	36
i-Share	1748	≥ 3*	12.76	223	1748	≥ 3*	9.55	167	NA	NA	NA	NA
ISSYS	238	≥ 3*	10.92	26	239	≥ 3*	11.30	27	228	≥ 7*	24.12	55
LBC1936	582	≥ 3*	25.26	147	582	≥ 2*	39.86	232	582	≥ 1*	22.68	132
NOMAS - AA	168	≥ 5*	22.62	38	168	≥ 5*	19.05	32	168	≥ 2*	14.88	25
NOMAS - EUR	138	≥ 4*	18.84	26	138	≥ 4*	22.46	31	138	≥ 2*	15.94	22
NOMAS - HISP	717	≥ 4*	22.59	162	717	≥ 4*	21.76	156	717	≥ 2*	11.44	82
MAS	130	≥ 2	22.31	29	130	≥ 7	28.46	37	NA	NA	NA	NA
OATS	184	≥ 2	28.26	52	184	≥ 3	27.17	50	NA	NA	NA	NA
RSI	885	≥ 11	23.73	210	914	≥ 7	21.66	198	933	≥ 6	21.86	204
RSII	642	≥ 12	22.12	142	643	≥ 6	18.66	120	643	≥ 6	22.71	146
RSIII**	2424	≥ 9.92	20.96	508	2425	≥ 3.84	8.95	217	2425	≥ 4.93	13.98	339
SHIP-2	956	≥ 4	25.10	240	998	≥ 3	13.63	136	1012	≥ 4	19.57	198
SHIP-Trend Batch 1	797	≥ 4	18.44	147	814	≥ 2	20.15	164	817	≥ 3	24.60	201
SHIP-Trend Batch 2	976	≥ 4	20.80	203	1028	≥ 2	22.96	236	1041	≥ 3	25.17	262
UKB**	28492	4.033748	25.08	7146	28655	1.50939	25.00	7164	28584	3.102163	24.92	7123
Total	41570	NA	23.73	9946	41875	NA	22.29	9419	40095	NA	23.23	9316
ASPS = Austrian Stroke Prevention Study; ASPS-Fam = Austrian Stroke Prevention Family Study; EDIS-SCES/EDIS-SIMES = The Singapore Chinese Eye Study/Singapore Malay Eye Study-2; FHS = Framingham Heart Study; i-Share = Internet-based Students' Health ResearchEnterprise Study; ISSYS =Investigating silent strokes in hypertensives ; LBC1936 = Lothian Birth Cohort 1936; NOMAS = Northern Manhattan Study…
*cut-offs corresponding to a PVS grade (versus a PVS number); PVS indicates perivascular spaces; ext-PVS, extensive PVS burden
** Automated measurement

## Sheet: Suppl.Table-3
Supplemental Table 3. GWAS genotyping platforms, imputation panels and quality control of genotypes
Study	Genotyping platforms - SNP panel	Genotyping center	Genotype calling algorithm	Sample call rate	SNP call rate	MAF	HWE p-value	Assessment of Population Stratification	Imputation software	Imputation reference panel	Analysis software used
3C-Dijon	Illumina Human 610-Quad BeadChip	Centre National de Génotypage, France	Illumina BeadStudio	0.95	> 0.98	> 0.01	> 10-6	EIGENSTRAT	MACH (version 1.0), minimac (release 11/16/2012)	1000G Phase1v3 all ethnicities	ProbABEL v. 0.1-3-pacoxph-fix-1
ASPS	Illumina Human610-Quad BeadChip Array	Human Genotyping Facility, Genetic Laboratory Department of Internal Medicine, Erasmus MC, Rotterdam, The Netherlands	Illumina	0.98	0.98	> 0.01	> 10-6	EIGENSTRAT	Michigan Imputation Server	HRC	Rvtests
ASPS-fam	Affymetrix Genome-Wide Human SNP Array 6.0	Medical University of Graz	Birdseed v2	0.98	0.98	0.05	> 5x10-6	EIGENSTRAT	Michigan Imputation Server	HRC	Rvtests
EDIS-SCES	Illumina HumanHap610-Quad BeadChip	Genome Institute of Singapore, Singapore	Illumina BeadStudio	>0.95	> 0.95	> 0.01	> 10-6	EIGENSTRAT	IMPUTE2	1000 Genomes Phase1v3 all ethnicities	snptest_v2.5.2
EDIS-SIMES	Illumina HumanHap610-Quad BeadChip	Genome Institute of Singapore, Singapore	Illumina BeadStudio	>0.95	> 0.95	> 0.01	> 10-6	EIGENSTRAT	IMPUTE2	1000 Genomes Phase1v3 all ethnicities	snptest_v2.5.2
FHS	Affymetrix GeneChip Human Mapping 500K Array +50K Human Gene Focused Panel	Affymetrix (Santa Clara), USA	Affymetrix BRLMM	0.97	> 0.98	≥ 0.01	> 10-6	EIGENSTRAT	MACH v1.0.16	HRC	R version 2.15.3
i-Share	Affymetrix Precision Medicine Axiom Array	McGill Genome Center	AxiomGT1 algorithm	0.05	> 0.98		> 10-3	Plink 1.9	Minimac4	HRC	Regenie
ISSYS	Human Core Exome chip	Washington University in Sta Louis	NR	0.95	0.95	0.05	1x10-7	EUR	Michigan Imputation Server Portal	1000 Genome Phase 3v5	SNPTEST v2.5.2
LBC 1936	Illumina 610 (Quad) Array	Wellcome Trust Clinical Research Facility Genetics Core, Western General Hospital, Edinburgh, UK		0.95	≥ 0.98	≥ 0.01	≥ 10-3	MDS	Minimac (stamped 2012-03-14)	1000 Genomes (Version 3)	ProbABEL
NOMAS	Affymetrix 6.0	Hussman Institute for Human Genomics	Affymetrix Power Tools	≤ 0.95 removed	≤ 0.95 removed prior to imputation	≤ 0.01 removed prior to imputation	p ≤ 1E-06 removed prior to imputation	PCs derived from Eigenstrat	IMPUTE2	1000 Genomes phase 1, version 3 reference panel	PLINK
Rotterdam Study I	Illumina HumanHap550K(+Duo) and 610-Quad BeadChip	Erasmus MC, Rotterdam, the Netherlands	Illumina Bead Studio	0.975	> 0.98	> 0.01	> 10-6	IBD matrix	MACH/Minimac (2012.11.16)	HRC	ProbABEL v.0.4.4
Rotterdam Study II	Illumina HumanHap550-Duo BeadChip	Erasmus MC, Rotterdam, the Netherlands	Illumina Bead Studio	0.975	> 0.98	> 0.01	> 10-6	IBD matrix	MACH/Minimac (2012.11.16)	HRC	ProbABEL v.0.4.4
Rotterdam Study III	Illumina HumanHap610K-Quad	Erasmus MC, Rotterdam, the Netherlands	Illumina Bead Studio	0.975	> 0.98	> 0.01	> 10-6	IBD matrix	MACH/Minimac	HRC	ProbABEL v.0.4.4
SHIP-2	Affymetrix SNP 6.0	Affymetrix, Inc.	Birdseed2	>92%	>95%	>0	> 10-4	PCA/MDS	Michigan Imputation Server (Eaglev2/Minimac3)	HRC v1.1	EPACTS-3.2.6-patched
SHIP-Trend Batch 1	Illumina Omni 2.5	Helmholtz Zentrum München	GenCall	>94%	>95%	>0	> 10-4	PCA/MDS	Michigan Imputation Server (Eaglev2/Minimac3)	HRC v1.1	EPACTS-3.2.6-patched
SHIP-Trend Batch 2	Illumina GSA	Helmholtz Zentrum München	GenCall	>94%	>95%	>0.01	> 10-4	PCA/MDS	Michigan Imputation Server (Eaglev2/Minimac3)	HRC v1.1	EPACTS-3.2.6-patched
UK Biobank	UK BiLEVE Axiom Array and UK Biobank Axiom Array	Affymetrix Research Services Laboratory	custom genotype calling pipeline	0.90	0.90	0.0001	> 10-6	PCA	IMPUTE4	Haplotype Reference Consortium and UK10K + 1000 Genomes	BOLT-LMM
SNP = Single Nucleotide Polymorphism; PC = Principal Component; TIV = Total Intracranial volume; ICV = Intracranial Volume; ASPS = Austrian Stroke Prevention Study; ASPS-Fam = Austrian Stroke Prevention Family Study; EDIS-SCES/EDIS-SIMES = The Singapore Chinese Eye Study/Singapore Malay Eye Study-2; FHS = Framingham Heart Study; i-Share = Internet-based Students' Health ResearchEnterprise Study; …
*Affymetrix SNP 6.0
† Illumina Omni 2.5

## Sheet: Suppl.Table-4
Supplemental Table 4. Description of the number of SNPs available for each study (GWAS meta-analysis)
Cohorts	PVS location	Number of SNPs analysed	Genomic inflation
3C-Dijon	BG	7261380	1.007
	WM	7968653	1.024
	HIP	7675322	1.011
ASPS	BG	5948446	1.012
	WM	6069660	1.024
	HIP	5885974	1.033
ASPS-Fam	BG	5573043	1.020
	WM	5537310	1.031
	HIP	5608621	1.035
EDIS-SCES	BG	2586935	1.049
	WM	4552198	1.056
	HIP	4436657	1.067
EDIS SIMES	BG	5258431	1.025
	WM	5422933	1.024
	HIP	4882427	1.051
FHS	BG	4724948	1.066
	WM**	4052567	1.073
	HIP	4481451	1.037
ISSYS	BG	4184141	1.042
	WM	4111833	1.052
	HIP	5400764	1.034
LBC1936	BG	7558359	1.030
	WM	7048095	1.014
	HIP	6923176	1.020
NOMAS - AA	BG	5774904	1.071
	WM	6337773	1.046
	HIP	4968438	1.066
NOMAS - EUR	BG	4881172	1.071
	WM	4515693	1.076
	HIP	4141868	1.070
NOMAS - HISP	BG	9134864	1.022
	WM	9109622	1.019
	HIP	7494231	0.994
RSI	BG	6905155	1.016
	WM	6979852	1.015
	HIP	6943995	1.011
RSII	BG	6237080	1.042
	WM	6455951	1.043
	HIP	6494418	1.031
RSIII	BG	7029280	1.033
	WM	7654040	1.031
	HIP	7634688	1.026
SHIP-2	BG	6393437	0.999
	WM	7132413	1.004
	HIP	6882595	0.998
SHIP-Trend Batch 1	BG	6756825	1.018
	WM	6604520	1.015
	HIP	7020821	1.041
SHIP-Trend Batch 2	BG	7193781	1.013
	WM	7003474	1.021
	HIP	7332705	1.015
UKB	BG	9756474	1.047
	WM	9756374	1.047
	HIP	9756408	1.047
ASPS = Austrian Stroke Prevention Study; ASPS-Fam = Austrian Stroke Prevention Family Study; EDIS-SCES/EDIS-SIMES = The Singapore Chinese Eye Study/Singapore Malay Eye Study-2; FHS = Framingham Heart Study; i-Share = Internet-based Students' Health ResearchEnterprise Study; ISSYS =Investigating silent strokes in hypertensives ; LBC1936 = Lothian Birth Cohort 1936; NOMAS = Northern Manhattan Study…

## Sheet: Suppl.Table-5
Supplemental Table 5. Association of the discovery meta-analysis genetics variants (p-value<5x10-6) with BG and HIP PVS in UKB and the combined meta-analysis
PVS location	SNP	chr:position	EA	EAF	Function	Nearest gene(s)	Direction	p-value discovery	p-value replication	p-value combined	N with ext-PVS	N total
White matter	rs4556147	9:113651161	a	0.7829	intronic	LPAR1	---?	8.35E-10*	1.151e-08*	6.073e-16*	9550	39516
	rs13079464	3:13822439	c	0.4622	intergenic	LINC00620,WNT7A	++++	3.33E-09*	5.664e-11*	5.21e-18*	9576	39654
	rs6011998	20:45269867	t	0.0501	intronic	SLC13A3	----	8.67E-08	3.364e-20*	7.359e-26*	9464	38960
	rs17279437	3:45814094	a	0.1021	exonic	SLC6A20	++??	1.30E-07	0.1287	5.862e-05	9406	38748
	rs59575399	12:128047938	a	0.0414	intergenic	LOC440117,FLJ37505	+???	9.06E-07	0.5395	0.1346	8426	34530
	rs6142067	20:32556572	t	0.5908	intergenic	CHMP4B,RALY	++++	1.93E-06	0.8338	0.01947	9576	39654
	rs6464428	7:154175541	a	0.8722	intronic	DPP6	+++?	2.11E-06	0.3012	0.1196	9423	38781
	rs1554025	3:96045264	t	0.2413	intergenic	LOC100287639,EPHA6	--++	2.15E-06	0.4307	0.0009635	9576	39654
Basal ganglia	rs821684	10:108143814	t	0.3198	intergenic	SORCS3,SORCS1	++++	5.08E-07	0.8143	0.01327	9152	40000
	rs9389375	6:136499402	t	0.6367	intronic	PDE7B	---?	6.67E-07	0.3312	0.0741	9093	39593
	rs10833296	11:20349036	a	0.6960	intergenic	DBX1,HTATIP2	++-?	1.25E-06	0.8436	0.006227	9120	39832
	rs9916042	17:4984447	a	0.3099	intronic	ZFP3	----	2.29E-06	0.8925	0.01628	9152	40000
	rs9558993	13:107936505	a	0.4229	intronic	FAM155A	++++	2.48E-06	0.8143	0.006787	9152	40000
	rs61794274	4:10679237	t	0.1660	intronic	CLNK	---?	3.69E-06	0.1493	0.0002528	9093	39593
	rs117620256	12:77997060	a	0.9583	intergenic	E2F7,NAV3	-???	4.32E-06	0.18	0.3209	8518	36916
Hippocampus	rs34083668	20:22251164	a	0.0256	intergenic	LOC100270679,LOC284788	+???	5.298e-07	0.8925	0.0336	8209	33995
	rs754662	5:26483239	a	0.7741	intergenic	LOC340107,CDH9	--??	8.387e-07	0.7066	0.02352	9283	39450
	rs57676448	12:53794787	t	0.1718	intronic	SP1	---?	1.388e-06	0.2509	0.0004227	9322	39662
	rs67111928	20:22030574	t	0.9600	intergenic	PAX1,LOC100270679	-???	1.662e-06	0.9023	0.04564	8556	35455
	rs117555764	10:94504644	a	0.0313	intergenic	HHEX,EXOC6	+???	2.725e-06	0.5099	0.005986	8660	36312
	rs6490704	13:22784751	t	0.9570	intergenic	LINC00424,BASP1P1	--??	2.789e-06	0.7262	0.01091	8742	37029
	rs62302014	4:64527904	c	0.0960	intergenic	LPHN3,TECRL	+???	2.853e-06	0.8436	0.02002	8728	36232
	rs17722628	16:6717521	a	0.7407	intronic	RBFOX1	+++?	3.176e-06	0.9316	0.01641	9352	39789
	rs374726	3:196969920	t	0.2759	intronic	DLG1	---+	3.615e-06	0.1287	0.235	9369	39968
	rs79116180	5:163125456	a	0.0322	intergenic	MAT2B	+???	4.077e-06	0.4506	0.2644	8212	33800
	rs1145152	3:9229209	t	0.5389	intronic	SRGAP3	+-++	4.539e-06	0.7457	0.006325	9399	40095
	rs34675660	18:39045647	a	0.0305	intergenic	LINC00669,KC6	+???	4.616e-06	0.6379	0.1153	8462	35300
	rs7908718	10:18668475	t	0.2073	intronic	CACNB2	++++	4.659e-06	0.1698	0.0003026	9399	40095
PVS = perivascular space burden; EA = Effect Allele; EAF = Effect Allele Frequency
N with ext-PVS corresponds to the number of participants with extensive PVS burden in the combined meta-analysis
N total corresponds to the number of participants in the combined meta-analysis
Direction corresponds to the association direction of EA and the phenotype (extensive PVS burden versus the rest) for European, Hispanic, Asian, and African American ancestry studies, in this order, in the combined meta-analysis
*Genome-wide significant association p-value <5x10-8

## Sheet: Suppl.Table-6
Supplemental Table 6. Conditional and joint multiple-SNP analysis of PVS GWAS summary statistics (GCTA-cojo)
Chr	SNP	rsID	SNPs previously identified	gene	refA	freq	b	se	p	n	freq_geno	bJ	bJ_se	pJ	LD_r
PVS in white matter
1	1:215141570	rs10494988	EUR + ALL	CENPF,KCNK2	T	0.3718	-0.0220733	0.00347885	2.229e-10	8716.92	0.38388	-0.0220733	0.00348668	2.43957e-10	0
2	2:56128091	rs7596872	EUR + ALL	EFEMP1	A	0.0972	-0.0139465	0.0021569	1.004e-10	60587.8	0.0975497	-0.0139465	0.00215762	1.0209e-10	0
3	3:13822439	rs13079464	EUR + ALL	WNT7A	C	0.4654	0.0298805	0.00359054	8.641e-17	7648.21	0.4409	0.0298805	0.00360653	1.17998e-16	0
3	3:124518362	rs3772833	EUR + ALL	ITGB5	A	0.1653	-0.019769	0.00269369	2.148e-13	24669.8	0.156958	-0.019769	0.00269658	2.28186e-13	0
3	3:193529824	rs6444747	EUR	OPA1	C	0.7161	-0.0204444	0.00324565	2.994e-10	11518.5	0.721375	-0.0204444	0.0032511	3.20649e-10	0
6	6:1364691	rs1922930	EUR + ALL	FOXQ1,FOXF2	A	0.8826	-0.0128598	0.00233433	3.599e-08	43807.4	0.890815	-0.0128622	0.00233511	3.62607e-08	-0.000397912
6	6:2617122	rs4959689	EUR + ALL	C6orf195	A	0.422	-0.0210178	0.00355511	3.371e-09	7994.81	0.42703	-0.0210211	0.00356265	3.62571e-09	0
7	7:134434661	rs10954468	EUR	BPGM,CALD1	A	0.5993	-0.0194717	0.00352748	3.394e-08	8253.8	0.616197	-0.0194717	0.00353377	3.58484e-08	0
8	8:42438616	rs62509329	EUR	SMIM19,CHRNB3	A	0.4114	0.019344	0.00354221	4.729e-08	8117.47	0.405995	0.019344	0.0035485	4.99943e-08	0
9	9:113658671	rs10817108	EUR + ALL	LPAR1	A	0.211	0.0235945	0.00294232	1.065e-15	17110	0.209508	0.0235945	0.00294776	1.20239e-15	0
11	11:70089700	rs12417836	EUR + ALL	FADD,PPFIA1	T	0.0679	0.0103168	0.00182437	1.562e-08	117469	0.0488519	0.0103168	0.00182461	1.56524e-08	0
15	15:85686327	rs8041189	EUR + ALL	PDE8A,LOC642423	A	0.3054	-0.0215964	0.00331539	7.304e-11	10573.6	0.321467	-0.0215964	0.00332188	7.96421e-11	0
17	17:42989063	rs1126642	EUR + ALL	GFAP	T	0.0426	-0.00915208	0.00147972	6.192e-10	277123	0.0386808	-0.00915208	0.00147982	6.22663e-10	0
19	19:18550434	rs2385089	EUR	ISYNA1	A	0.262	0.0173615	0.00316527	4.136e-08	12747.5	0.342272	0.0173615	0.00316888	4.28333e-08	0
20	20:45231949	rs3092466	EUR + ALL	SLC13A3	A	0.6017	-0.0272717	0.00352393	1.005e-14	8257.76	0.711512	-0.298092	0.00862196	6.30097e-262	-0.936429
20	20:45232757	rs847058	EUR + ALL	SLC13A3	A	0.6282	-0.0248773	0.00347885	8.615e-13	8706.04	0.282786	-0.293787	0.00850593	2.07781e-261	0.0570483
20	20:45255618	rs2425881	EUR + ALL	SLC13A3	A	0.8283	0.0217143	0.0027348	2.024e-15	23207.4	0.842272	0.0208181	0.00274218	3.15484e-14	-0.113036
20	20:45269867	rs6011998	EUR	SLC13A3	T	0.0446	-0.0152748	0.00149695	1.897e-24	259113	0.0472338	-0.0146968	0.00149971	1.12856e-22	0.0532176
20	20:45276381	rs112407396	ALL	SLC13A3	A	0.973	-0.00852503	0.00123355	4.814e-12	619120	0.94822	-0.00768382	0.00123533	4.97051e-10	-0.00436364
20	20:45302135	rs56104388	ALL	SLC13A3	T	0.9876	0.00521048	0.000890071	4.795e-09	2551150	0.987826	0.00533205	0.000890151	2.09772e-09	0.0228689
20	20:45326511	rs8119727	EUR + ALL	TP53RK,SLC2A10	A	0.035	-0.00862049	0.0013612	2.399e-10	395468	0.0303591	-0.00897168	0.00136282	4.60524e-11	0
PVS in basal ganglia
2	2:203808532	rs140244541	EUR	ALS2CR8	A	0.1583	-0.0156433	0.00263001	2.712e-09	27906.5	0.165896	-0.0156433	0.00263163	2.77574e-09	0
3	3:171565463	rs6769442	EUR + ALL	TMEM212	A	0.2502	-0.0175247	0.00310556	1.675e-08	14201.6	0.237479	-0.0175247	0.00310893	1.73157e-08	0
PVS in hippocampus
1	1:183104863	rs2022392	EUR	LAMC1	A	0.565	0.0272893	0.00355608	1.668e-14	8184.39	0.551857	0.0272893	0.00356863	2.05717e-14	0
1	1:215137222	rs6540873	EUR + ALL	CENPF,KCNK2	A	0.6247	0.0210405	0.00347318	1.382e-09	9022.1	0.613577	0.0210405	0.00348004	1.4844e-09	0
2	2:56128091	rs7596872	EUR	EFEMP1	A	0.0972	-0.0139611	0.00214885	8.203e-11	63179.1	0.0975497	-0.0139611	0.00214955	8.30985e-11	0
In bold secondary association signals identified with COJO analysis

## Sheet: Suppl.Table-7
Supplemental Table 7. Loci reaching GW significance in the multiancestry meta-analysis using MR-MEGA
PVS location	rsID	chr:position	EA	EAF	Functional annotation	Nearest gene	Analysis	Direction	N total	N cohorts	p-MRMega	p-het-ancestry	p-het-residual
White matter	rs4809594	20:45266820	C	0.951233	intronic	SLC13A3	EUR + ALL (r²=1 with rs6011998)	++?++?+???+?++++++	38654	12	1.9082e-17	0.0109089	0.124862
	rs2425884	20:45258292	C	0.569317	intronic	SLC13A3	EUR + ALL	+-+++++++---++++++	39822	18	2.27684e-13	0.217758	0.0697636
	rs13079464	3:13822439	G	0.537718	intergenic	WNT7A	EUR + ALL	--------+---+-----	39822	18	5.49138e-12	0.0403791	0.000282143
	rs1871397	3:124492000	C	0.835047	intronic	ITGB5	EUR + ALL (r²= 0.93 with rs3772833)	++++-++???+?-+++++	39087	14	6.82772e-11	0.0290382	0.020844
	rs2425881	20:45255618	A	0.826529	intronic	SLC13A3	EUR + ALL	++++++-???-?++++++	39087	14	3.47389e-10	0.427282	0.0208181
	rs10465128	9:113733760	G	0.865102	intronic	LPAR1	EUR + ALL (r²= 0.62 with rs10817108)	-------???-?------	39087	14	8.35545e-10	0.105656	0.00274557
	rs112407396	20:45276381	A	0.973014	intronic	SLC13A3	ALL	???-????????-?----	34530	6	9.30136e-10	0.0798924	0.81689
	rs72485816	20:45314435	T	0.960933	UTR3	TP53RK	EUR (r²=0.94 with rs6094423) + ALL	+??++????-+?+++++?	37342	10	4.21405e-08	0.518943	0.756178
Hippocampus	rs4651135	1:182970547	A	0.462781	intergenic	SHCBP1L,LAMC1	ALL + EUR (r²= 1.0 with rs10797812 and r²= 0.86 with rs2022392)	-+-------?----+---	39927	17	6.68053e-12	0.0832126	0.392693
	rs78857879	2:56135099	G	0.904278	intronic	EFEMP1	ALL + EUR (r²= 0.96 with rs7596872)	++?+???+????+++-++	38008	10	2.03164e-08	0.318016	0.286462
EA = Effect Allele; EAF = Effect Allele Frequency; p-MRMega = P-value MR-MEGA analysis; p-het-ancestry = heterogenity P-value due to ancestry; P-het-residual = residual heterogeneity P-value
Significant association after multiple testing correction (p<5x10-8) are in bold
There was no significant association for PVS in basal ganglia using MR-MEGA
r² was estimated using LD reference from European 1000G reference panel

## Sheet: Suppl.Table_8
Supplementary table 8. Gene-based test (European GWAS meta-analysis)
PVS location	Gene	Chr	Start	Stop	Test	nSNPs	p-value
Gene-based test using MAGMA software
White matter	SLC13A3*	20	45176463	45314714	9.0768	319	5.59E-20
	LPAR1*	9	113625543	113810981	7.9451	564	9.70E-16
	ITGB5*	3	124470795	124630265	7.1774	546	3.55E-13
	UMPS*	3	124439213	124474040	6.3406	146	1.14E-10
	TP53RK*	20	45303004	45328418	5.6471	61	8.16E-09
	CALD1*	7	134419003	134665479	5.3919	679	3.49E-08
	SLC20A2*	8	42263993	42407069	5.1965	260	1.02E-07
	INS-IGF2**	11	2143768	2192439	5.1902	127	1.05E-07
	SMIM19*	8	42386298	42419603	5.1361	87	1.40E-07
	PRKAG2**	7	151243197	151584210	5.0716	1116	1.97E-07
	SLC2A10*	20	45328126	45374965	4.9962	141	2.92E-07
	C6orf195*	6	2612147	2644837	4.8651	112	5.72E-07
	ISYNA1*	19	18535198	18559111	4.7557	43	9.89E-07
	IGF2**	11	2140342	2180833	4.6171	116	1.95E-06
	LRP4**	11	46868419	46950193	4.6072	137	2.04E-06
	CKAP5**	11	46754598	46877847	4.5847	186	2.27E-06
Basal ganglia	WDR12*	2	203729505	203889521	6.0588	315	6.86E-10
	ICA1L*	2	203630690	203746708	6.0511	233	7.19E-10
	CARF*	2	203766937	203861786	5.9321	180	1.50E-09
	SH3PXD2A**	10	105338285	105625301	5.7679	715	4.01E-09
	WNT3**	17	44829872	44920520	5.5494	139	1.43E-08
	KCNRG**	13	50579390	50605058	4.8485	41	6.22E-07
	NBEAL1*	2	203869602	204101101	4.8067	339	7.67E-07
	TRIM13**	13	50560024	50604617	4.7791	70	8.80E-07
	ZMYND15**	17	4633319	4659411	4.7707	80	9.18E-07
	SPRYD7**	13	50476842	50520626	4.6972	78	1.32E-06
Hippocampus	LAMC1*	1	182982595	183124727	7.3307	523	1.14E-13
	PDZRN4**	12	41572250	41978392	4.6213	1326	1.91E-06
Gene-based test using VEGAS software
White matter	SLC13A3*	20	45186462	45313124	4659.26531027464	392	1e-06
	TP53RK	20	45313004	45318301	769.704867981724	64	1e-06
	UMPS	3	124449213	124468120	3037.28644008759	180	1e-06
	ITGB5*	3	124480795	124606500	7183.6086366543	520	1e-06
	SLC20A2	8	42273980	42397356	1930.52804156267	286	1e-06
	SMIM19*	8	42396298	42408140	1045.61948759541	86	1e-06
	LPAR1*	9	113635542	113801523	7126.07594005568	569	1e-06
Basal ganglia	SH3PXD2A**	10	105353784	105615195	3160.01050126089	717	1e-06
	ICA1L*	2	203637873	203736708	3813.10701577088	243	1e-06
	WDR12	2	203745323	203776949	1982.19276281214	113	1e-06
	CARF	2	203776978	203851060	3166.41227744052	181	1e-06
	TMEM212*	3	171561139	171577108	863.173989830804	108	1e-06
	NSF**	17	44668035	44834830	887.291619401848	83	2e-06
Hippocampus	LAMC1	1	182992572	183114727	18607.2942113423	530	1e-06
PVS = perivascular spaces; Chr = chromosome; nSNPs = number of SNPs; P = P-value
*Genes identified in the GWAS meta-analysis as the nearest genes of the top SNPs of this locus
**New genes identified in the gene based analysis and localized in loci not identified in the European GWAS meta-analysis
Gene wide significance was defined at P-value = 0.05/19,037 = 2.63x10-6 (MAGMA), and at P-value = 0.05/18,371 = 2.72x10-6 (VEGAS), significant results are represented in this table

## Sheet: Suppl.Table-9
Supplemental Table 9. Genetics variants associated with high perivascular spaces burden (5x10-8<p-value<5x10-6) in the combined meta-analysis
PVS location	SNP	chr:position	EA/OA	EAF	Function	Nearest gene	Direction	N with ext-PVS	N total	p-value
White matter	rs2385089	19:18550434	A/C	0.2678	intergenic	ISYNA1, ELL	+++-	9614	39822	5.733e-08
	rs9849380	3:193576388	T/C	0.5477	intergenic	OPA1, LOC647323	++--	9614	39822	6.11e-08
	rs10954468	7:134434661	A/C	0.6013	intergenic	BPGM, CALD1	-+?-	9524	39483	8.788e-08
	rs60146667	3:13830544	A/T	0.8902	intergenic	LINC00620, WNT7A	--??	9406	38748	1.386e-07
	rs2530322	10:116028335	A/G	0.3062	intronic	VWA2	+--+	9614	39822	1.909e-07
	rs72845701	10:104197327	A/G	0.8909	downstream	MIR146B	--+?	9464	38960	2.123e-07
	rs66993071	16:19448417	T/C	0.0344	intronic	TMC5	--??	9076	37174	3.488e-07
	rs9660771	1:221720239	T/C	0.3928	intergenic	C1orf140, DUSP10	+---	9614	39822	5.306e-07
	rs138400337	1:218570643	T/G	0.8423	intronic	TGFB2	++-?	9496	39087	5.723e-07
	rs9423648	10:5587867	T/G	0.503	intergenic	CALML3, ASB13	----	9614	39822	5.968e-07
	rs76091057	11:6973388	T/C	0.6213	intronic	ZNF215	-+-?	9576	39654	6.272e-07
	rs117546058	8:131399611	A/G	0.0228	intronic	ASAP1	+???	7626	30916	7.308e-07
	rs62524236	8:144792321	A/G	0.0188	intergenic	CCDC166, MAPK15	+???	7626	30916	8.043e-07
	rs185306972	12:57482813	A/G	0.0215	UTR5	NAB2	-???	7469	29992	8.423e-07
	rs17227185	9:113996008	T/C	0.366	intergenic	LPAR1, OR2K2	++??	9486	39315	8.561e-07
	rs2757524	20:45275663	T/G	0.3293	intronic	SLC13A3	+-+?	9576	39654	8.934e-07
	rs12707199	7:134716430	A/T	0.295	intronic	AGBL3	--+-	9588	39684	1.01e-06
	rs3741204	11:2169908	T/C	0.6163	intronic	IGF2,INS-IGF2	-?-?	9241	38217	1.158e-06
	rs59062173	2:239520069	T/C	0.6826	intergenic	LOC151171, TWIST2	++?-	7868	31835	1.163e-06
	rs3952231	5:77739827	C/G	0.5309	intronic	SCAMP1	----	9614	39822	1.261e-06
	rs1571965	1:108519529	T/C	0.0349	ncRNA_intronic	VAV3-AS1	-???	8767	35875	1.354e-06
	rs146324154	4:108090608	A/T	0.9887	intergenic	DKK2, PAPSS1	-???	7123	28492	1.385e-06
	rs639151	11:128540210	C/G	0.1403	intergenic	ETS1, FLI1	--??	9406	38748	1.429e-06
	rs72825916	2:103070982	T/C	0.1399	intergenic	IL18RAP, SLC9A4	--??	9406	38748	1.949e-06
	rs7778190	7:42626466	A/G	0.6931	intergenic	GLI3, C7orf25	++?-	9524	39483	2.103e-06
	rs1326360	10:108059623	A/G	0.6109	intergenic	SORCS3, SORCS1	--+-	9614	39822	2.219e-06
	rs62478245	7:151505698	T/C	0.0385	intronic	PRKAG2	-???	8175	33392	3.115e-06
	rs11244737	10:127658748	T/C	0.5952	intronic	FANK1	----	7958	32174	3.24e-06
	rs75199873	13:44888902	A/G	0.1238	intergenic	SMIM2-IT1, SERP2	+-??	9406	38748	3.439e-06
	rs151321810	5:17105538	T/G	0.033	intergenic	MYO10, LOC285696	+???	8625	35233	3.511e-06
	rs7111270	11:47019777	C/G	0.7679	intronic	C11orf49	++-?	8252	33533	4.015e-06
	rs7478785	11:62784542	T/C	0.2935	intergenic	SLC22A8, SLC22A24	+?-?	9388	38799	4.246e-06
	rs16856400	1:205803724	A/C	0.9374	intronic	PM20D1	--?+	9371	38610	4.4e-06
	rs2532539	12:4097667	A/G	0.0432	intergenic	PARP11, CCND2	--??	8730	35889	4.42e-06
Basal ganglia	rs4790224	17:4646064	A/G	0.3266	intronic	ZMYND15	++++	9152	40000	1.499e-07
	rs12323265	13:111014716	A/G	0.4205	intronic	COL4A2	--+-	9152	40000	1.592e-07
	rs7140070	13:50644776	T/C	0.1205	ncRNA_intronic	DLEU2	-+?-	7786	31760	1.992e-07
	rs11191748	10:105378567	T/C	0.0833	intronic	SH3PXD2A	++-?	9020	39265	4.031e-07
	rs12899001	15:23949863	T/C	0.5179	intergenic	NDN, PWRN2	----	8981	38500	5.929e-07
	rs714447	2:27028992	T/C	0.2608	intergenic	CENPA, DPYSL5	++-+	9152	40000	8.513e-07
	rs9515201	13:111040798	A/C	0.3045	intronic	COL4A2	++-+	9152	40000	1.024e-06
	rs4630220	10:105459116	A/G	0.2877	intronic	SH3PXD2A	----	9152	40000	1.327e-06
	rs28502733	14:23260024	T/C	0.39	intronic	SLC7A7	++++	9152	40000	1.36e-06
	rs73159170	3:146377876	A/G	0.931	intergenic	PLSCR5, ZIC4	+???	8813	38336	1.457e-06
	rs17279437	3:45814094	A/G	0.1021	exonic	SLC6A20	++??	8969	39053	1.464e-06
	rs116666645	2:61366163	A/C	0.0509	downstream	KIAA1841	+???	8638	37559	1.587e-06
	rs7224296	17:44800046	A/G	0.7228	intronic	NSF	-+--	9152	40000	1.638e-06
	rs117953000	21:47164799	T/C	0.0295	intergenic	SLC19A1, LOC100129027	+???	7781	32922	1.689e-06
	rs1991161	2:218676890	T/C	0.5724	intronic	TNS1	-+-+	9152	40000	2.847e-06
	rs72907816	2:186825172	T/G	0.2552	intergenic	FSIP2, ZC3H15	--??	9042	39381	2.951e-06
	rs9847565	3:146369166	C/G	0.5434	intergenic	PLSCR5, ZIC4	++++	9152	40000	3.402e-06
	rs2769981	20:48397429	T/C	0.283	intergenic	B4GALT5, SLC9A8	---?	9120	39832	3.704e-06
	rs3924574	4:71458732	T/C	0.4709	intronic	AMBN	--??	8666	37538	3.715e-06
	rs6426245	1:247552822	C/G	0.6781	intergenic	ZNF496, NLRP3	++++	9152	40000	4.281e-06
	rs2581191	3:27928036	C/G	0.3226	intergenic	EOMES, CMC1	---?	9120	39832	4.795e-06
Hippocampus	rs10786776	10:105662994	A/G	0.5934	intronic	OBFC1	++-+	9399	40095	1.073e-06
	rs2851245	4:103113209	A/G	0.3172	intergenic	BANK1, SLC39A8	-+-?	9374	39927	1.208e-06
	rs931191	18:22179994	T/C	0.1871	intergenic	HRH4, LOC729950	++??	9283	39450	1.287e-06
	rs111833237	2:80101783	A/C	0.0595	intronic	CTNNA2	+-??	9060	38449	1.535e-06
	rs6879760	5:140875959	T/C	0.0385	intronic	PCDHGA1,PCDHGA10,PCDHGA11,PCDHGA12,PCDHGA2,PCDHGA3,PCDHGA4,PCDHGA5,PCDHGA6,PCDHGA7,PCDHGA8,PCDHGA9,PCDHGB1,PCDHGB2,PCDHGB3,PCDHGB4,PCDHGB5,PCDHGB6,PCDHGB7,PCDHGC3,PCDHGC4,PCDHGC5	++??	8874	37611	1.932e-06
	rs79850821	3:188169356	A/C	0.0951	intronic	LPP	+???	9033	38008	3.27e-06
	rs2272950	20:35838372	A/T	0.8064	intronic	RPN2	---+	9377	39957	3.294e-06
	rs73062730	2:196126559	A/G	0.9864	intergenic	NONE, SLC39A10	-???	7545	31009	3.885e-06
	rs151009274	10:99573766	T/C	0.0292	intergenic	SFRP5, GOLGA7B	-???	8057	33550	4.018e-06
	rs2529242	7:101358697	C/G	0.6869	intergenic	MYL10, CUX1	---+	9399	40095	4.181e-06
	rs140769312	5:103840438	C/G	0.9841	intergenic	NUDT12, RAB9BP1	+???	7146	28584	4.703e-06
	rs11500477	11:47409051	A/T	0.3724	intergenic	SPI1, SLC39A13	--++	9399	40095	4.88e-06
PVS indicates perivascular spaces; EA, effective allele; EAF, effective allele frequency, N with ext-PVS correspond to the number of participants with extensive PVS burden in the combined meta-analysis; N total correspond to the number of participants in the combined meta-analysis; direction corresponds to the association direction of EA and the phenotype (extensive PVS burden versus the rest)

## Sheet: Suppl.Table_10
Supplemental Table 10. Shared genetic contribution between extensive PVS burden and other traits - LD-score regression
	PVS (WM)		PVS (BG)		PVS (HIP)
	rg (SE)	P-Value	rg (SE)	P-Value	rg (SE)	P-Value
PVS
PVS (WM)	0.11 (0.02)	NA	0.24 (0.12)	0.055	0.27 (0.09)	0.003
PVS (BG)			0.05 (0.01)	NA	0.63 (0.14)	7.23E-06*
PVS (HIP)					0.08 (0.01)	NA
Vascular risk factors
Systolic blood pressure	0.07 (0.04)	0.057	0.25 (0.06)	0.0001*	0.16 (0.05)	0.0007*
Diastolic blood pressure	0.06 (0.04)	0.103	0.30 (0.07)	4.09E-05*	0.18 (0.05)	0.0001*
Pulse pressure	0.06 (0.04)	0.096	0.13 (0.06)	0.024	0.09 (0.05)	0.050
LDL cholesterol	0.003 (0.08)	0.973	0.01 (0.13)	0.955	-0.07 (0.11)	0.503
Triglyceride	0.09 (0.06)	0.175	-0.02 (0.09)	0.839	-0.10 (0.08)	0.183
HDL cholesterol	-0.02 (0.07)	0.757	-0.18 (0.11)	0.105	0.17 (0.07)	0.021
Type 2 diabetes	0.046 (0.05)	0.334	0.15 (0.08)	0.065	0.06 (0.06)	0.304
Body mass index	0.06 (0.04)	0.112	0.04 (0.05)	0.452	-0.04 (0.04)	0.381
Other MRI traits
WMHV	0.09 (0.07)	0.199	0.43 (0.10)	3.46E-05*	0.22 (0.10)	0.021
Covert MRI-defined brain infarcts	0.19 (0.22)	0.386	1.15 (0.52)	0.028	0.47 (0.28)	0.096
Covert MRI-defined lacunes	0.08 (0.19)	0.662	1.05 (0.45)	0.02	0.42 (0.25)	0.095
Subcortical volume
Hippocampal volume	0.02 (0.09)	0.81	0.05 (0.15)	0.75	0.47 (0.11)	7.41E-06*
Amygdala	0.11 (0.09)	0.252	0.17 (0.16)	0.291	0.13 (0.11)	0.261
Accumbens	0.03 (0.08)	0.704	0.14 (0.12)	0.234	-0.01 (0.09)	0.928
Caudate	-0.08 (0.07)	0.231	0.30 (0.09)	0.0004*	0.10 (0.07)	0.151
Pallidum	-0.11 (0.09)	0.237	0.09 (0.14)	0.514	0.07 (0.11)	0.508
Putamen	0.06 (0.06)	0.305	0.28 (0.1)	0.005	0.10 (0.07)	0.176
Clinical traits
Stroke
Any stroke	0.01 (0.08)	0.902	0.63 (0.13)	3.92E-07*	0.36 (0.09)	0.0002*
Ischemic stroke	0.002 (0.07)	0.974	0.57 (0.12)	2.55E-06*	0.29 (0.09)	0.0015
Large artery stroke	0.23 (0.28)	0.414	0.89 (0.61)	0.146	0.22 (0.31)	0.488
Cardioembolic stroke	-0.03 (0.1)	0.768	0.23 (0.14)	0.098	0.11 (0.12)	0.346
Small vessel disease stroke	-0.14 (0.15)	0.339	0.75 (0.24)	0.002	0.31 (0.18)	0.090
Intracerebral hemorrhage	-0.11 (0.17)	0.501	0.59 (0.26)	0.024	0.31 (0.18)	0.088
Lobar intracerebral hemorrhage	-0.06 (0.29)	0.824	0.35 (0.53)	0.514	0.26 (0.37)	0.480
Deep intracerebral hemorrhage	-0.14 (0.17)	0.416	0.75 (0.26)	0.004	0.43 (0.18)	0.020
Alzheimer disease	-0.09 (0.08)	0.244	0.004 (0.13)	0.975	-0.04 (0.10)	0.693
Parkinson disease	-0.08 (0.06)	0.220	-0.05 (0.11)	0.665	0.05 (0.08)	0.569
Sleep
Sleep duration	-0.02 (0.04)	0.690	0.08 (0.06)	0.158	0.04 (0.06)	0.458
Short sleep	0.02 (0.05)	0.716	-0.08 (0.07)	0.226	-0.09 (0.06)	0.142
Long sleep	-0.03 (0.06)	0.576	0.04 (0.09)	0.626	-0.04 (0.08)	0.600
PVS indicates perivascular spaces; WM, white matter; BG, basal ganglia; HIP; hippocampus; WMHV, white matter hyperintensity volume
*significant association after multiple testing correction: p-value < 7.9 x 10-4)
Nominally significant associations are in bold without any asterisk: p-value<0.05

[truncated: 13 more sheets: Suppl.Table_11, Suppl.Table-12, Suppl.Table-13, Suppl.Table-14, Suppl.Table-15, Suppl.Table16, Suppl.Table-17, Suppl.Table-18, Suppl.Table-19, Suppl.Table-20, Suppl.Table-21, Suppl.Table-22, Suppl.Table-23]
